# Supplementary material for: Kinetics and mechanism of the cyclization of ω-(p-nitrophenyl)-hydantoic acid amides: steric hindrance to proton transfer causes a 104-fold change in rateElectronic supplementary information (ESI) available: Observed first-order rate coefficients, constants for solvent and buffer catalysis for the cyclization reactions. See http://www.rsc.org/suppdata/ob/b2/b211040g/
Source: Royal Society of Chemistry journal article supplement (doi:10.1039/b211040g), 2003-02-12
Supplement: table.doc [file table.doc]

**Kinetics and mechanism of the cyclization of -(p-nitrophenyl)-hydantoic acid amides: steric hindrance to proton transfer causes a 104 change in rate**

Violina T. Angelovaa, A. J. Kirbyb, Asen H. Koedjikova and Ivan G. Pojarlieffa

# Table Observed first order rate coefficients, *kobs,* the constants for catalysis by the solvent species, *ko,* extrapolated to zero buffer concentration and the second order constants for buffer catalysis, *kbuff,* at 25 oC and ionic strength of 1 M (KCl)

# *Cyclization of 5-(4-nitrophenyl)-2,3-dimethylhydantoic acid amide*

| [Acid] or [Buffer] mol dm-3 | pHa | 106 *kobs* s-1 | ko s-1 | *kbuff* dm-3 mol-1 s-1 |
| --- | --- | --- | --- | --- |
|  |  |  |  |  |
| HCl |  |  |  |  |
| 1.00 | 0.070 | 192.48 |  |  |
| 0.5 | 0.3711 | 129.90 |  |  |
| 0.2 | 0.7690 | 47.42 |  |  |
| 0.1 | 1,070 | 26.31 |  |  |
| 0.05 | 1,371 | 17.1 |  |  |
| 0.02 | 1,769 | 9.34 |  |  |
| 0.01 | 2,070 | 7.17 |  |  |
| 0.005 | 2,371 | 6.60 |  |  |
| 0.003 | 2,5935 | 6.35 |  |  |
|  |  |  |  |  |
| Glycine  30% base |  |  |  |  |
| 1 | 2.231 | 11.1 |  |  |
| 0.5 | 2.338 | 9.28 |  |  |
| 0.1 | 2.459 | 7.67 |  |  |
| 0.01 | 2.762 | 6.31 | 7.28x10-6 | 3.86x10-6 |
| Glycine  50% base |  |  |  |  |
| 1 | 2.572 | 9.92 |  |  |
| 0.5 | 2.654 | 8.19 |  |  |
| 0.1 | 2.733 | 6.34 |  |  |
| 0.01 | 2.950 | 5.3 | 5.86x10-6 | 5.21x10-6 |
| Glycine  70% base |  |  |  |  |
| 1 | 2.971 | 16.8 |  |  |
| 0.5 | 2.961 | 11.2 |  |  |
| [Acid] or [Buffer] mol dm-3 | pHa | 106 *kobs* s-1 | ko s-1 | *kbuff* dm-3 mol-1 s-1 |
| 0.1 | 2.980 | 7.42 |  |  |
| 0.01 | 3.178 | 6.46 | 6.35x10-6 | 1.02x10-5 |
| Glycine  90% base |  |  |  |  |
| 1 | 3.504 | 31.1 |  |  |
| 0.5 | 3.537 | 20.8 |  |  |
| 0.1 | 3.549 | 11.5 |  |  |
| 0.01 | 3.685 | 8.26 | 8.40x10-6 | 2.38x10-5 |
| Formate  30%base |  |  |  |  |
| 1 | 3.223 | 21.67 |  |  |
| 0.5 | 3.296 | 17.7 |  |  |
| 0.1 | 3.365 | 11.69 |  |  |
| 0.01 | 3.461 | 9.759 | 1.04x10-5 | 1.19x10-5 |
| Formate  70%base |  |  |  |  |
| 1 | 3.975 | 52.73 |  |  |
| 0.5 | 4.005 | 36.8 |  |  |
| 0.1 | 4.002 | 14.2 |  |  |
| 0.01 | 4.050 | 9.40 | 8.79x10-6 | 5.56x10-5 |
| Acetate  30%base |  |  |  |  |
| 1 | 4.365 | 105 |  |  |
| 0.5 | 4.405 | 69.7 |  |  |
| 0.1 | 4.029 | 36.6 |  |  |
| 0.01 | 4.444 | 13.1 | 1.37x10-5 | 1.05x10-4 |
| Acetate  70%base |  |  |  |  |
| 1 | 5.068 | 249 |  |  |
| 0.5 | 5.065 | 156 |  |  |
| 0.1 | 5.055 | 58.3 |  |  |
| 0.01 | 5.042 | 22.1 | 2.11x10-5 | 2.56x10-4 |
| Acetate  90%base |  |  |  |  |
| 1 | 5.648 | 467 |  |  |
| 0.5 | 5.626 | 276.5 |  |  |
| 0.1 | 5.607 | 95.2 |  |  |
| 0.01 | 5.595 | 46.5 | 4.34x10-5 | 4.42x10-4 |
|  |  |  |  |  |
|  |  |  |  |  |
| [Acid] or [Buffer] mol dm-3 | pHa | 106 *kobs* s-1 | ko s-1 | *kbuff* dm-3 mol-1 s-1 |
| Cacodylate  30%base |  |  |  |  |
| 0.15 | 5.607 | 428 |  |  |
| 0.1 | 5.611 | 314 |  |  |
| 0.05 | 5.613 | 166 |  |  |
| 0.01 | 5.628 | 95.9 | 6.91x10-5 | 2.29x10-3 |
|  |  |  |  |  |
| Cacodylate  50%base |  |  |  |  |
| 0.15 | 5.976 | 538 |  |  |
| 0.10 | 5.968 | 375 |  |  |
| 0.05 | 5.972 | 329 |  |  |
| 0.01 | 5.971 | 149 | 1.28x10-4 | 2.77x10-3 |
| Cacodylate  70%base |  |  |  |  |
| 0.15 | 6.340 | 1150 |  |  |
| 0.1 | 6.336 | 748 |  |  |
| 0.05 | 6.335 | 520 | 2.56x10-4 | 5.40x10-3 |
| 0.01 | 6.334 | 315 |  |  |
| KH2PO4  10%base |  |  |  |  |
| 0.2 | 5.531  5.552 | 355  431 |  |  |
| 0.1 | 5.540  5.565 | 236  243 |  |  |
| 0.032 | 5.571  5.592 | 125  156 |  |  |
| 0.016 | 5.600 | 140 | 8.12x10-5 | 1.55x10-3 |
| KH2PO4  30%base |  |  |  |  |
| 0.6 | 6.203  6.166  6.025 | 3720  3830  3778 |  |  |
| 0.2 | 6.165  6.153  6.100 | 1440  1653  1505 |  |  |
| 0.1 | 6.154  6.136  6.105 | 857.3  952.56  962 | 2.68x10-5 | 6.09x10-3 |
| 0.032 | 6.152  6.132  6.110 | 437.2  469.6  452 |  |  |
|  |  |  |  |  |
|  |  |  |  |  |
| [Acid] or [Buffer] mol dm-3 | pHa | 106 *kobs* s-1 | ko s-1 | *kbuff* dm-3 mol-1 s-1 |
| KH2PO4  50%base |  |  |  |  |
| 0.5 | 6.664  6.625 | 7720  8230 |  |  |
| 0.2 | 6.520  6.561 | 3196  3220 |  |  |
| 0.10 | 6.517  6.520 | 1829  1880 | 3,05x10-4 | 1,52x10-2 |
| 0.032 | 6.517  6.500 | 819  908 |  |  |
| KH2PO4  70%base |  |  |  |  |
| 0.4 | 7.095 | 11700o |  |  |
| 0.2 | 6.994  6.975 | 5890  5780 |  |  |
| 0.1 | 6.940  6.921 | 3240  3010 |  |  |
| 0.032 | 6.925  6.89 | 1430  1400 | 6,09x10-4 | 2,60-2 |
| 0.016 | 6.863 | 1070 |  |  |
| 0.008 | 6.821 | 846 |  |  |
| 0.0064 | 6.824 | 802 |  |  |
| 0.0032 | 6.825 | 661 |  |  |
| KH2PO4  80%base |  |  |  |  |
| 0.008 | 7.025 | 1135 |  |  |
| 0.0064 | 7.028 | 968 |  |  |
| 0.0032 | 7.029 | 756 |  |  |
| 0.0016 | 7.039 | 619 | 4.98x10-4 | 0.0772 |
| KH2PO4  84% base |  |  |  |  |
| 0.0016 | 7.213 | 942 |  |  |
| 0.0032 | 7.195 | 1210 |  |  |
| 0.0064 | 7.182 | 1520 |  |  |
| 0.008 | 7.162 | 1670 | 7.86x10-4 | 0.114 |
| KH2PO4b  90%base |  |  |  |  |
| 0,0080 | 7,351e | 1690 |  |  |
| 0,0064 | 7,35 | 1550 |  |  |
| 0,0032 | 7,352 | 1050 |  |  |
| 0,0016 | 7,352 | 986 | 7,473x10-4 | 0.119 |
| [Acid] or [Buffer] mol dm-3 | pHa | 106 *kobs* s-1 | ko s-1 | *kbuff* dm-3 mol-1 s-1 |
| Trisb  10% base |  |  |  |  |
| 0.008* | 7.18 | 321 |  |  |
| 0.0064 | 7.271 | 258 |  |  |
| 0.0032 | 7.270 | 211 |  |  |
| 0.0016 | 7.275 | 203 | 1,80x10-4 | 0.0116 |
| Trisb  20% base |  |  |  |  |
| 0.008* | 7.63 | 422 |  |  |
| 0.0064 | 7.615 | 424 |  |  |
| 0.0032 | 7.64 | 330 |  |  |
| 0.0016 | 7.648 | 288 | 2,55x10-4 | 0.0230 |
| 0.0016 | 7.51 | 288 |  |  |
| 0.0032 | 7.537 | 366 |  |  |
| 0.0064 | 7.525 | 437 |  |  |
| 0.008 | 7.515 | 455 | 2.57x10-4 | 0.0267 |
| Trisb  30% base |  |  |  |  |
| 0.008* | 7.946 | 550 |  |  |
| 0.0064 | 7.958 | 520 |  |  |
| 0.0032 | 7.965 | 467 |  |  |
| 0.0016 | 7.975 | 296 | 2.89x10-4 | 0.0351 |
| Trisb  50% base |  |  |  |  |
| 0.008* | 8.302 | 761 |  |  |
| 0.0064 | 8.329 | 856 |  |  |
| 0.0032 | 8.32 | 579 |  |  |
| 0.0016 | 8.305 | 516 | 3.88-4c | 0.0696c |
| Trisb  70% base |  |  |  |  |
| 0.008* | 8.852 | 976 |  |  |
| 0.0064 | 8.827 | 934 |  |  |
| 0.0032 | 8.790 | 685 |  |  |
| 0.0016 | 8.799 | 494 | 3.55x10-4c | 0.0934c |
|  |  |  |  |  |

*Cyclization of 5-(4-nitrophenyl)-2,2,3-trimethylhydantoic acid amide*

| [Acid] or [Buffer] mol dm-3 | pHa | 105*kobs* s-1 | 105 ko s-1 | 105*kbuff* dm-3 mol-1s-1 |
| --- | --- | --- | --- | --- |
|  |  |  |  |  |
| HCl |  |  |  |  |
| 1.00 | 0.070 | 1680 |  |  |
| 0.5 | 0.3711 | 710 |  |  |
| 0.2 | 0.7690 | 320 |  |  |
| 0.1 | 1,070 | 130 |  |  |
| 0.05 | 1,371 | 68.3 |  |  |
| 0.02 | 1,769 | 30.3 |  |  |
| 0.01 | 2,070 | 19.2 |  |  |
| 0.005 | 2,371 | 11.2 |  |  |
| 0.003 | 2,5935 | 9.04 |  |  |
| Glycine  30% base |  |  |  |  |
| 1 | 2.040 | 32.80 |  |  |
| 0.5 | 2.139 | 25.20 |  |  |
| 0.1 | 2.291 | 19.00 |  |  |
| 0.01 | 2.660 | 31.10 | 12.4 | 22.8 |
|  |  |  |  |  |
| Glycine  50% base |  |  |  |  |
| 1 | 2.404 | 33.00 |  |  |
| 0.5 | 2.466 | 22.90 |  |  |
| 0.1 | 2.546 | 12.90 |  |  |
| 0.01 | 2.809 | 9.21 | 9.45 | 25.3 |
| Glycine  70% base |  |  |  |  |
| 1 | 2.873 | 47.20 |  |  |
| 0.5 | 2.888 | 27.70 |  |  |
| 0.1 | 2.912 | 13.00 |  |  |
| 0.01 | 3.022 | 9.23 | 8.94 | 38.1 |
| Glycine  90% base |  |  |  |  |
| 1 | 3.508 | 103 |  |  |
| 0.5 | 3.474 | 64.70 |  |  |
| 0.1 | 3.489 | 24.40 |  |  |
| 0.01 | 3.703 | 14.60 | 10.7 | 94.6 |
| Formate  30%base |  |  |  |  |
| 1 | 3.080 | 66.60 |  |  |
| 0.5 | 3.192 | 45.80 |  |  |
| 0.1 | 3.260 | 19.50 |  |  |
| 0.01 | 3.385 | 14.80 | 15.3 | 55.798 |
| [Acid] or [Buffer] mol dm-3 | pHa | 106 *kobs* s-1 | ko s-1 | *kbuff* dm-3 mol-1 s-1 |
| Formate  50%base |  |  |  |  |
| 1 | 3.511 | 115 |  |  |
| 0.5 | 3.567 | 71.60 |  |  |
| 0.1 | 3.611 | 31.10 |  |  |
| 0.01 | 3.671 | 15.60 | 21.6 | 95.6 |
| Formate  70%base |  |  |  |  |
| 1 | 3.806 | 147 |  |  |
| 0.5 | 3.822 | 96.30 |  |  |
| 0.1 | 3.857 | 35.20 |  |  |
| 0.01 | 3.901 | 1.73 | 16.8 | 132 |
| Formate  90%base |  |  |  |  |
| 1 | 4.458 | 266 |  |  |
| 0.5 | 4.459 | 137 |  |  |
| 0.1 | 4.461 | 53.4 |  |  |
| 0.01 | 4.500 | 33.9 | 31.4 | 223 |
| Acetate  30%base |  |  |  |  |
| 1 | 4.137 | 502.47 |  |  |
| 0.5 | 4.198 | 295.68 |  |  |
| 0.1 | 4.219 | 99.64 |  |  |
| 0.01 | 4.304 | 33.186 | 30.0 | 520 |
| Acetate  50%base |  |  |  |  |
| 1 | 4.598 | 1044.1 |  |  |
| 0.5 | 4.623 | 601.87 |  |  |
| 0.1 | 4.680 | 186.67 |  |  |
| 0.01 | 4.645 | 79.11 | 71 | 1030 |
| Acetate  70%base |  |  |  |  |
| 0.1 | 4.960 | 291.9 |  |  |
| 0.05 | 4.962 | 104.3 |  |  |
| 0.03 | 4.964 | 177.4 |  |  |
| 0.01 | 4.973 | 132 | 117 | 1780 |
| Acetate  90%base |  |  |  |  |
| 1 | 5.511 | 668.66 |  |  |
| 0.5 | 5.515 | 498.89 |  |  |
| 0.1 | 5.517 | 437.53 |  |  |
| 0.01 | 5.535 | 417.64 | 521 | 2770 |
| [Acid] or [Buffer] mol dm-3 | pHa | 106 *kobs* s-1 | ko s-1 | *kbuff* dm-3 mol-1 s-1 |
| KH2PO4  10%base |  |  |  |  |
| 0.2 | 5.496 | 2251.1 |  |  |
| 0.1 | 5.524 | 1357.6 |  |  |
| 0.032 | 5.555 | 788.71 |  |  |
| 0.016 | 5.586 | 577.12 | 453 | 9110 |
| KH2PO4  30%base |  |  |  |  |
| 0.2 | 6.105 | 6741 |  |  |
| 0.1 | 6.113 | 4570 |  |  |
| 0.032 | 6.117 | 2875.2 |  |  |
| 0.016 | 6.125 | 1846.5 | 1570 | 27900 |
|  |  |  |  |  |

aaH = 0.85[HCl] (A. H. Koedjikov, I. B. Blagoeva, I. G. Pojarlieff and A. J. Kirby. *J. Chem. Soc., Perkin* *Trans. 2*, 1996, 2479).

bRate constants calculated by means of eqn. (2) which takes into account the effect on absorbance of the equilibrium involving products.

cFrom last three points

*At all buffer ratios the value for 0.008 M buffer deviated negatively from the linear dependence.
